# Supplementary material
Source: PubMed Central journal article supplement (PMC2679807)
Supplement: NIHMS26875-supplement-01.pdf [file NIHMS26875-supplement-01.pdf]

## **SIRT1 regulates the function of the Nijmegen breakage syndrome protein**

**Zhigang Yuan, Xiaohong Zhang, Nilanjan Sengupta, William S. Lane, and Edward Seto**

### **Supplementary Experimental Procedures**

#### **Plasmids, Antibodies, and Viruses**

The following expression plasmids used in these experiments have been described previously: pcDNA3-Myc-NBS1 (Maser et al., 2001), HA-NBS1 (Lim et al., 2000), Flag-ATM (Lim et al., 2000), Flag-PCAF (Yang et al., 1996), HA-p300 (Aizawa et al., 2004), pRc/RSV-HA-CBP (Zhang et al., 2000), Flag-SIRT1-7 (Michishita et al., 2005; North et al., 2003), Myc-SIRT1 (Langley et al., 2002), GST-SIRT1 (Langley et al., 2002), and Myc-SIRT1(H363Y) (Langley et al., 2002). The plasmid encoding Myc-NBS1mt was generated using the QuickChange Site-Directed Mutagenesis kit following the manufacturer's protocol (Stratagene). Plasmids encoding GST-NBS1 deletion mutants were created by inserting PCR products of NBS1 fragments into Bam H1/Not 1 digested pGEX-5X-1 vectors (Amersham). pBS/U6-SIRT1 was constructed by inserting oligodeoxynucleotides, which targeted the sequence 5'GAAGTTGACCTCCTCATTGT3' into the pBS/U6 vector (Sui et al., 2002). SIRT1 siRNA and control siRNA adenoviruses were described previously (Rodgers et al., 2005). Plasmids that express Myc-tagged NBS1 lysine to glutamine mutants (5KQ: K544Q/K665Q/K690Q/K698Q/K715Q; 7KQ: K441Q/K504Q/K544Q/K665Q/K690Q/K698Q/K715Q; 9KQ: K233Q/K334Q/K441Q/K504Q/K544Q/K665Q/K690Q/K698Q/K715Q; 10KQ: K208Q/K233Q/K334Q/K441Q/K504Q/K544Q/K665Q/K690Q/K698Q/K715Q) were generated by standard PCR and subcloning.

Mouse affinity purified monoclonal anti-Flag M2, rabbit affinity purified polyclonal anti-HA, and mouse monoclonal anti-acetylated-tubulin (clone 6-11B-1) antibodies were purchased from Sigma. Mouse monoclonal anti-c-Myc (clone 9E10) and mouse monoclonal anti-p53 (clone DO-1) antibodies were purchased from Santa Cruz Biotechnology. Rabbit polyclonal anti-hNBS1, rabbit polyclonal anti-phosphorylated-Ser343-hNBS1, rabbit polyclonal anti-phosphorylated-Ser343-mNbs1, and rabbit polyclonal anti-ATM were purchased from Novus Biologicals. Mouse monoclonal anti-hNBS1 (clone 34) was purchased from BD Biosciences. Protein A purified mouse monoclonal anti-phosphorylated-Ser1981-ATM (clone 10H11.E12) was purchased from Rockland Immunochemicals. Mouse monoclonal anti-hNBS1 (clone 1C3), mouse monoclonal anti-MRE11 (clone 12D7), and mouse monoclonal anti-RAD50 (clone 13B3) were purchased from GeneTex. Rabbit polyclonal anti-acetyl-lysine, rabbit polyclonal anti-SIRT1, and mouse monoclonal anti-GST (clone DG122-2A7) antibodies were purchased from Upstate (Millipore). Mouse monoclonal anti-BrdU (clone BMC9318) was purchased from Roche. Rabbit polyclonal anti-acetylated-Lys382-p53 was purchased from Cell Signaling Technology.

## References

Aizawa, H., Hu, S.C., Bobb, K., Balakrishnan, K., Ince, G., Gurevich, I., Cowan, M., and Ghosh, A. (2004). Dendrite development regulated by CREST, a calcium-regulated transcriptional activator. *Science* *303*, 197-202.

Langley, E., Pearson, M., Faretta, M., Bauer, U.M., Frye, R.A., Minucci, S., Pelicci, P.G., and Kouzarides, T. (2002). Human SIR2 deacetylates p53 and antagonizes PML/p53-induced cellular senescence. *EMBO J.* *21*, 2383-2396.

Lim, D.S., Kim, S.T., Xu, B., Maser, R.S., Lin, J., Petrini, J.H., and Kastan, M.B. (2000). ATM phosphorylates p95/nbs1 in an S-phase checkpoint pathway. *Nature* *404*, 613-617.

Maser, R.S., Zinkel, R., and Petrini, J.H. (2001). An alternative mode of translation permits production of a variant NBS1 protein from the common Nijmegen breakage syndrome allele. *Nat. Genet.* *27*, 417-421.

Michishita, E., Park, J.Y., Burneskis, J.M., Barrett, J.C., and Horikawa, I. (2005). Evolutionarily conserved and nonconserved cellular localizations and functions of human SIRT proteins. *Mol. Biol. Cell* *16*, 4623-4635.

North, B.J., Marshall, B.L., Borra, M.T., Denu, J.M., and Verdin, E. (2003). The human Sir2 ortholog, SIRT2, is an NAD<sup>+</sup>-dependent tubulin deacetylase. *Mol. Cell* *11*, 437-444.

Rodgers, J.T., Lerin, C., Haas, W., Gygi, S.P., Spiegelman, B.M., and Puigserver, P. (2005). Nutrient control of glucose homeostasis through a complex of PGC-1alpha and SIRT1. *Nature* 434, 113-118.

Sui, G., Soohoo, C., Affar el, B., Gay, F., Shi, Y., Forrester, W.C., and Shi, Y. (2002). A DNA vector-based RNAi technology to suppress gene expression in mammalian cells. *Proc. Natl. Acad. Sci. USA* 99, 5515-5520.

Yang, X.J., Ogryzko, V.V., Nishikawa, J., Howard, B.H., and Nakatani, Y. (1996). A p300/CBP-associated factor that competes with the adenoviral oncoprotein E1A. *Nature* 382, 319-324.

Zhang, Q., Yao, H., Vo, N., and Goodman, R.H. (2000). Acetylation of adenovirus E1A regulates binding of the transcriptional corepressor CtBP. *Proc. Natl. Acad. Sci. USA* 97, 14323-14328.

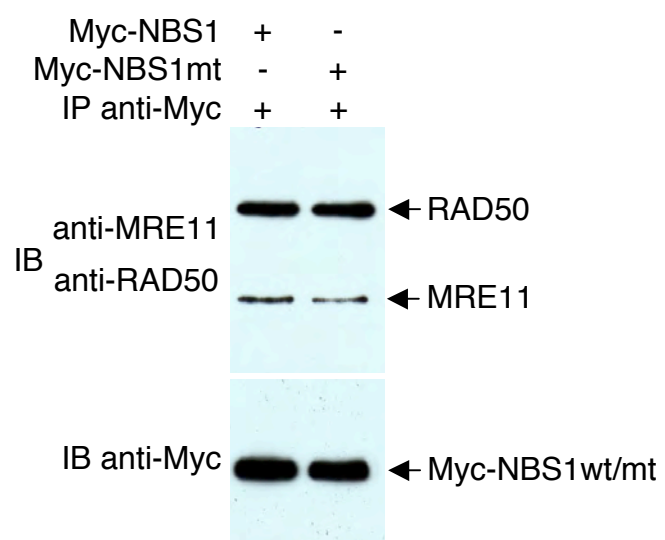

**Figure S1.** NBS1 acetylation does not affect its association with MRE11 and RAD50
